# Supplementary material
Source: publisher figshare collection journal article supplement (https://acs.figshare.com/ndownloader/files/5819925)

Adenosylcobalamin, 470 nm probe

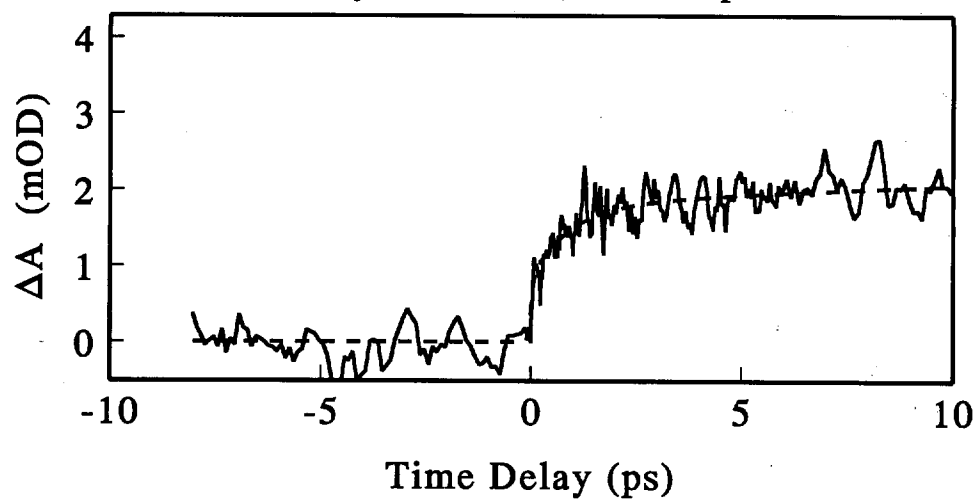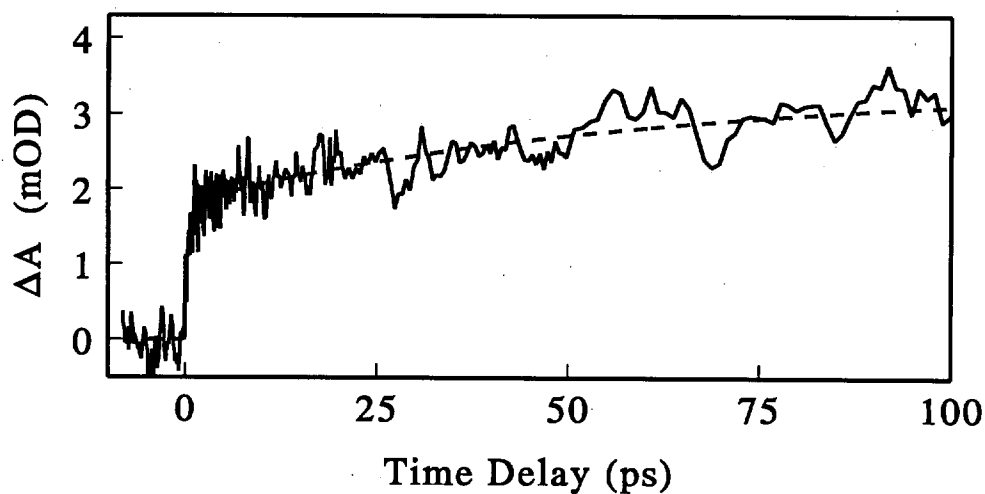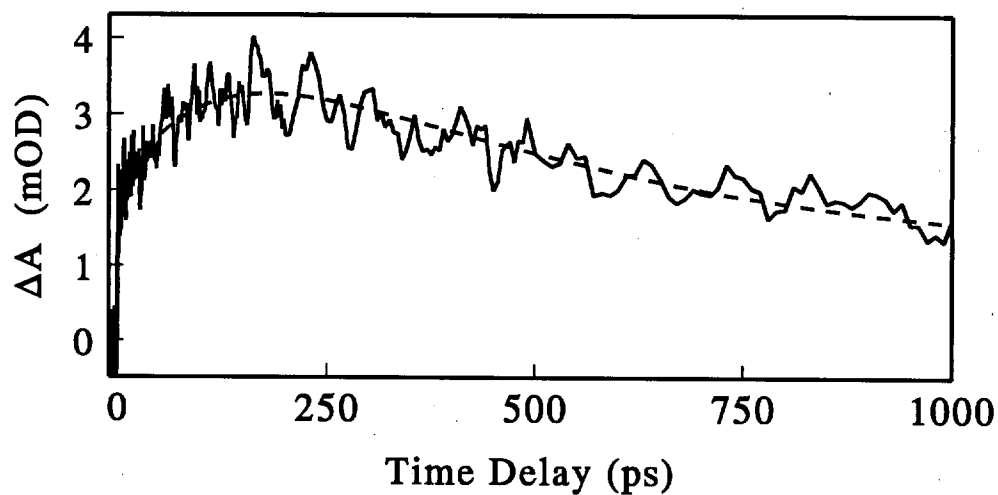

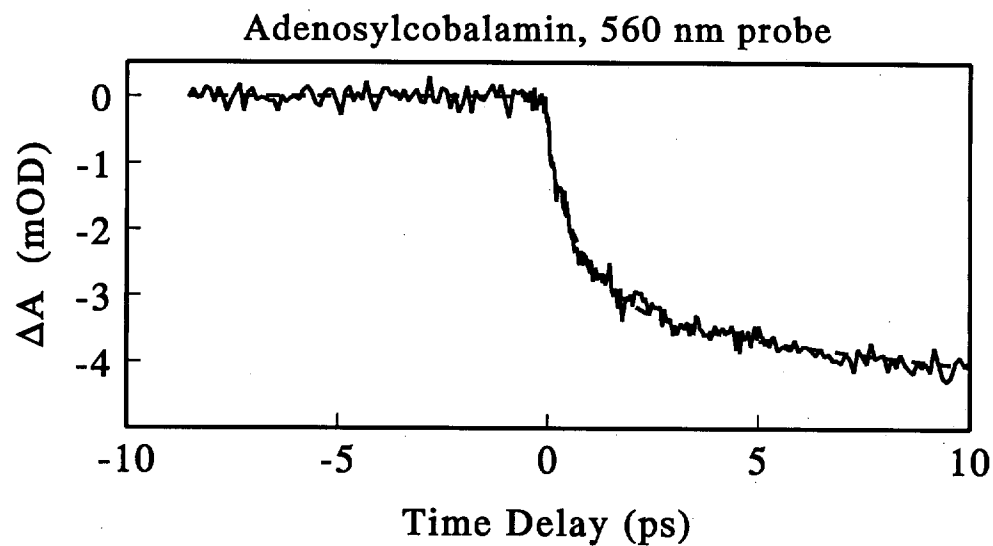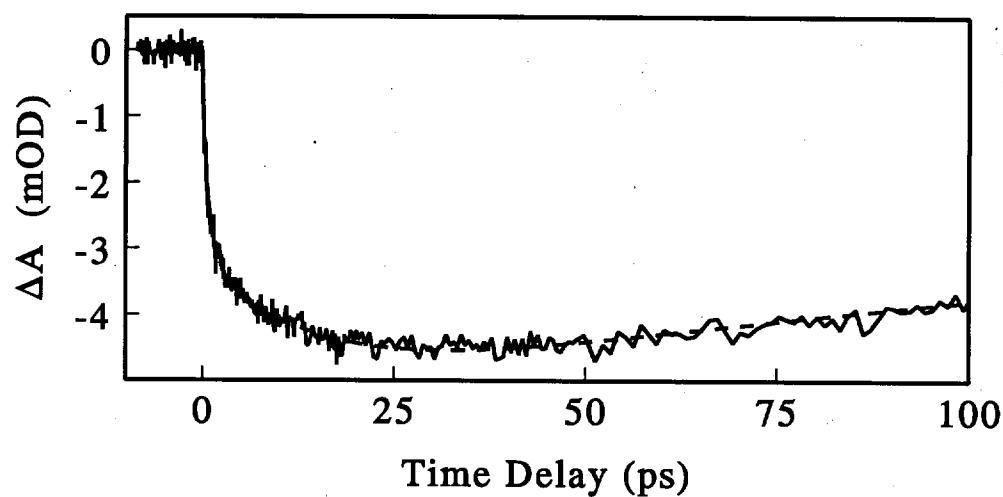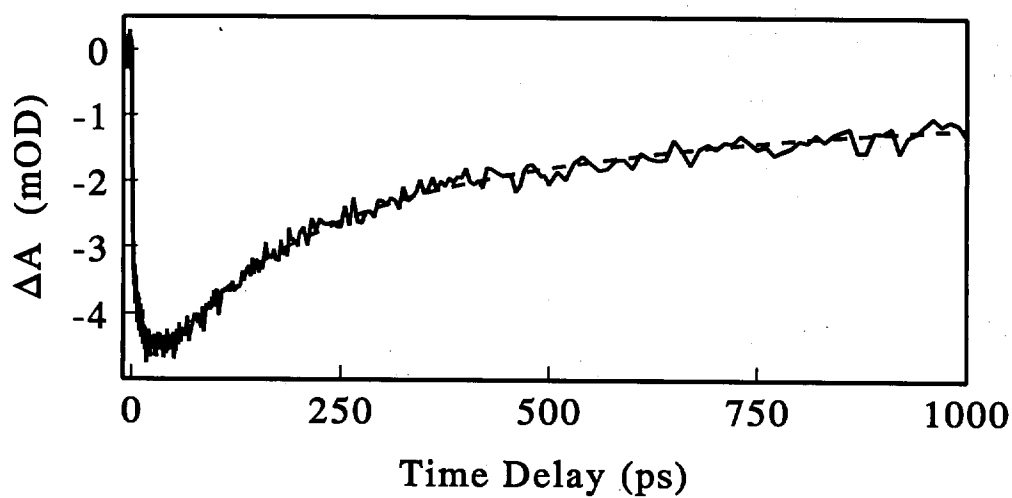

Adenosylcobalamin, 600 nm probe

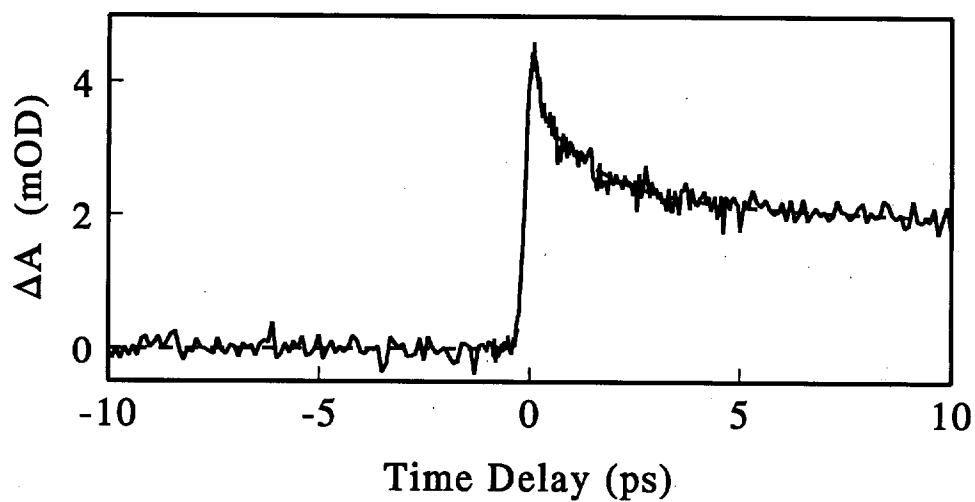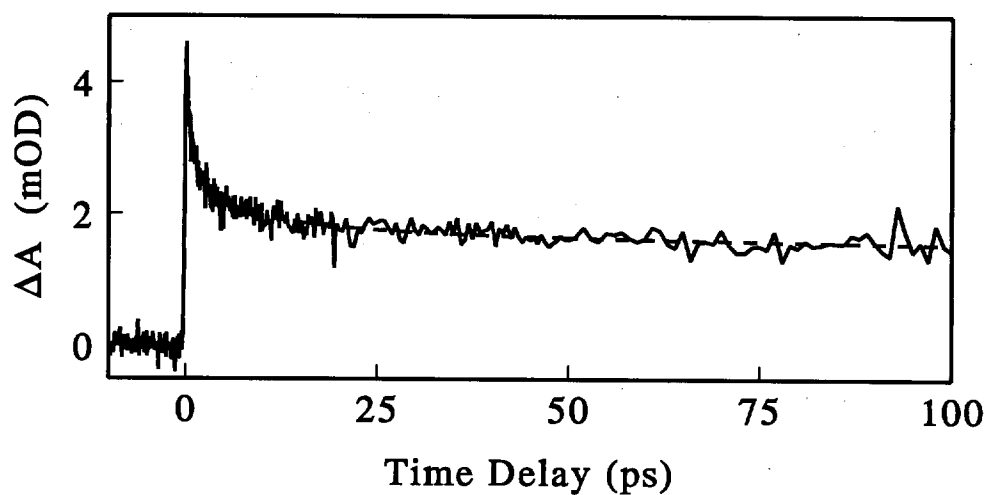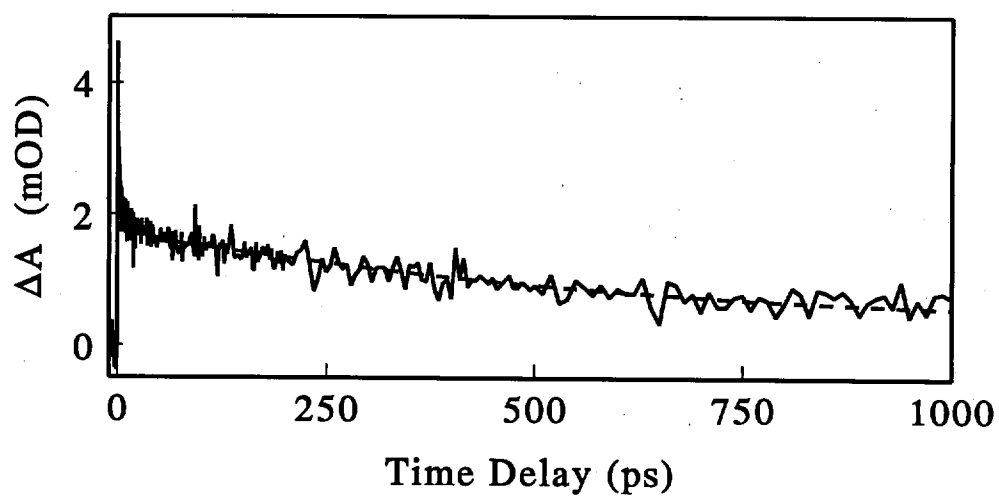

Methylcobalamin, 470 nm probe

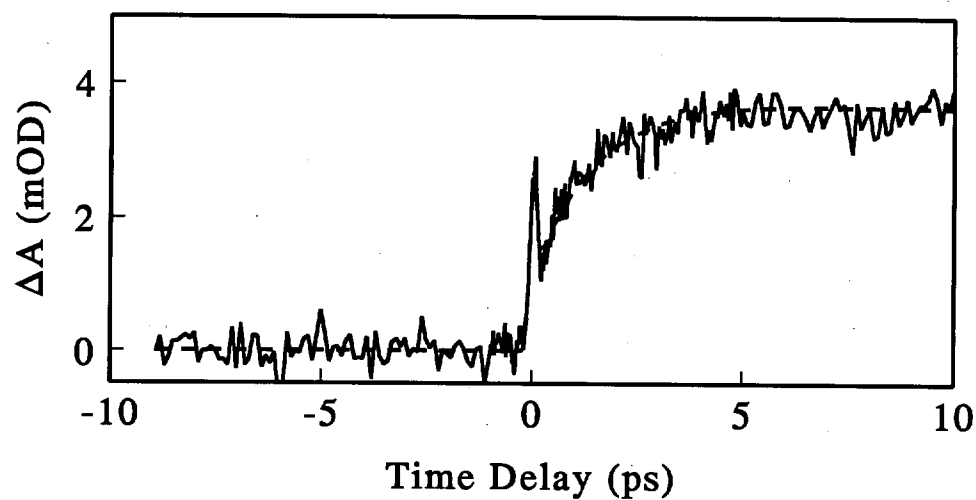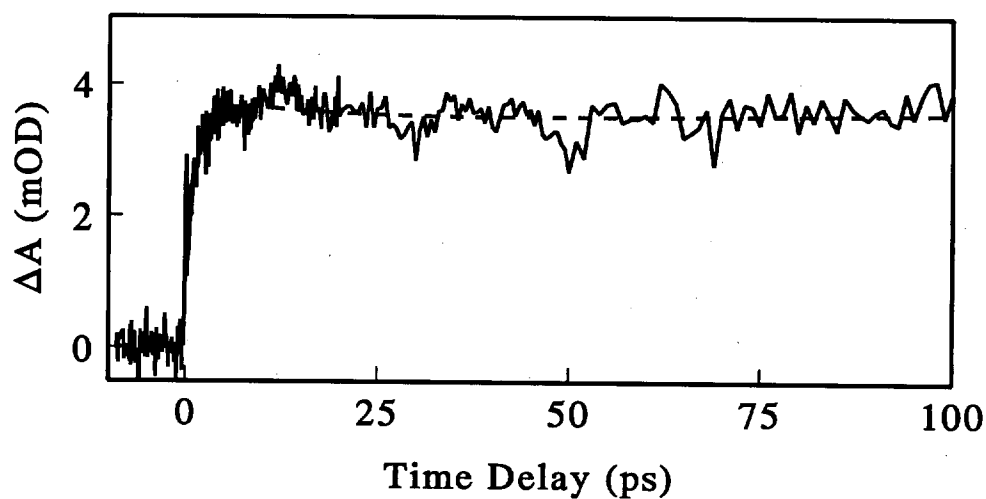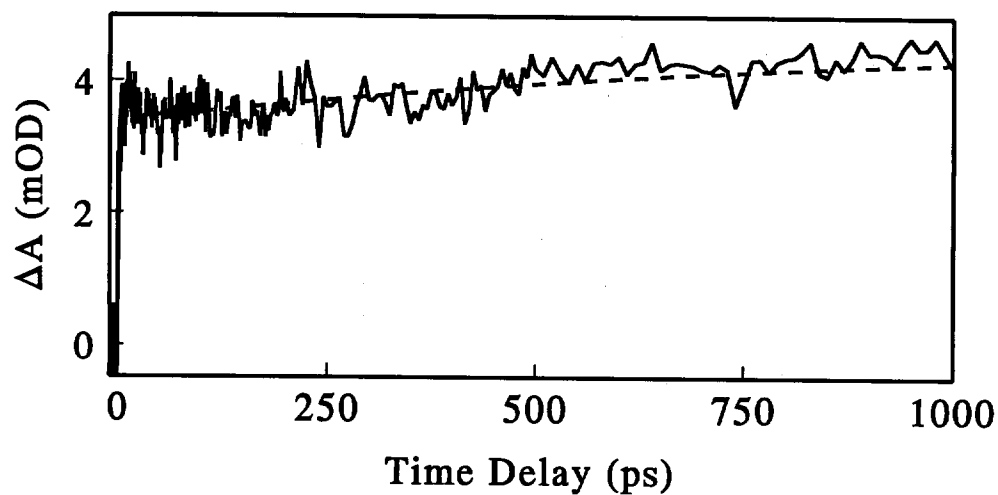

Methylcobalamin, 560 nm probe

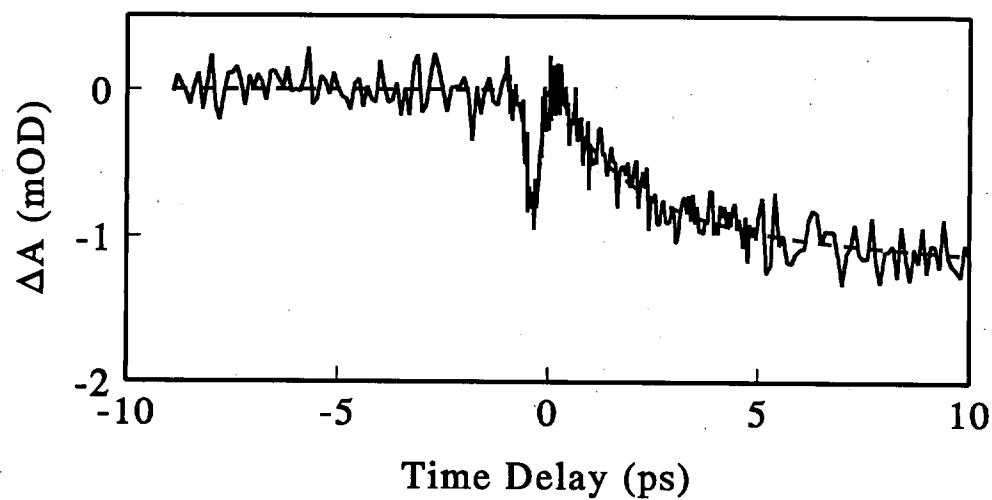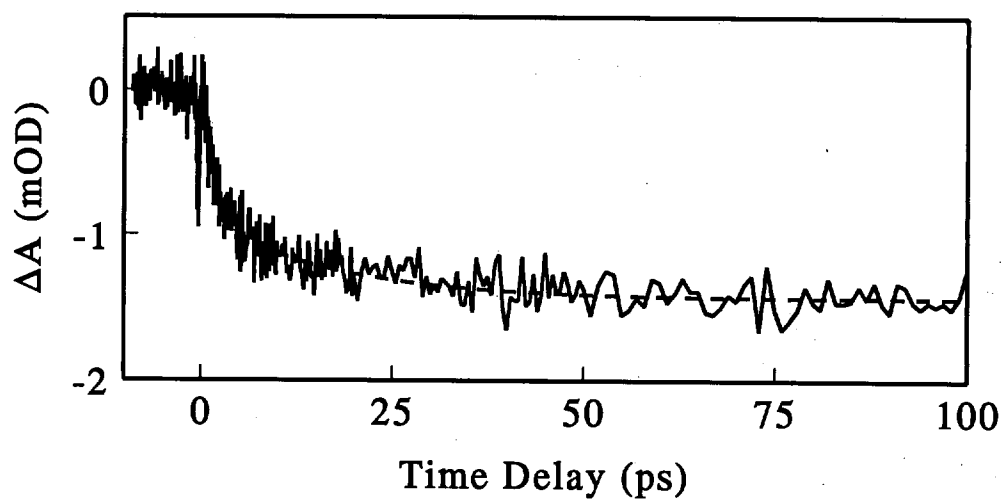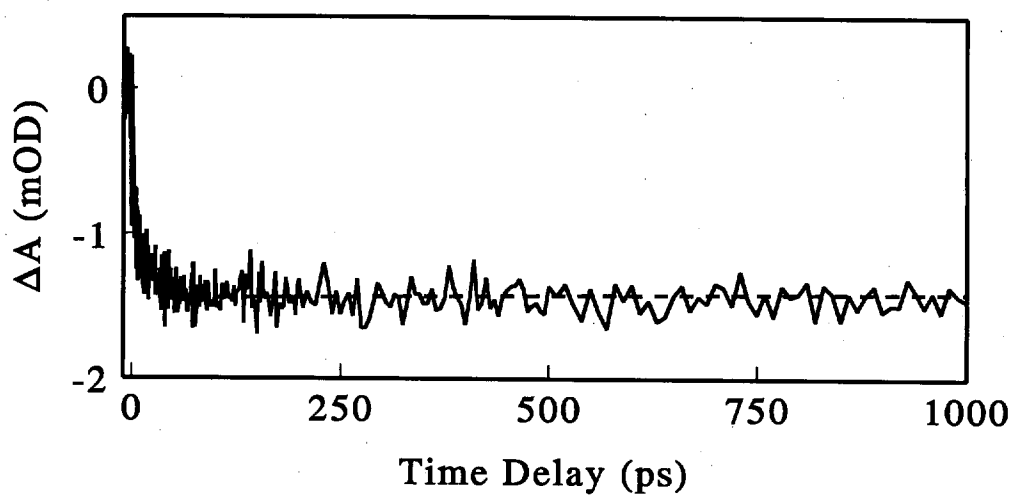

Methylcobalamin, 600 nm probe

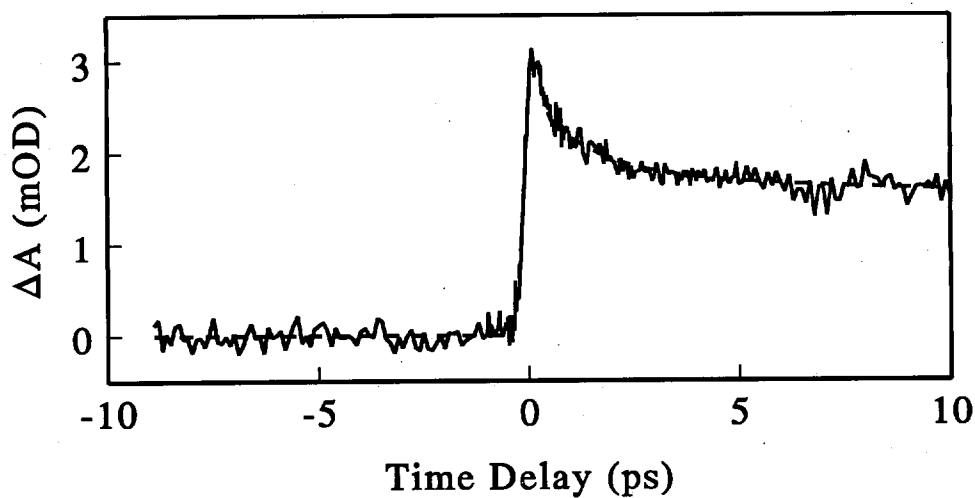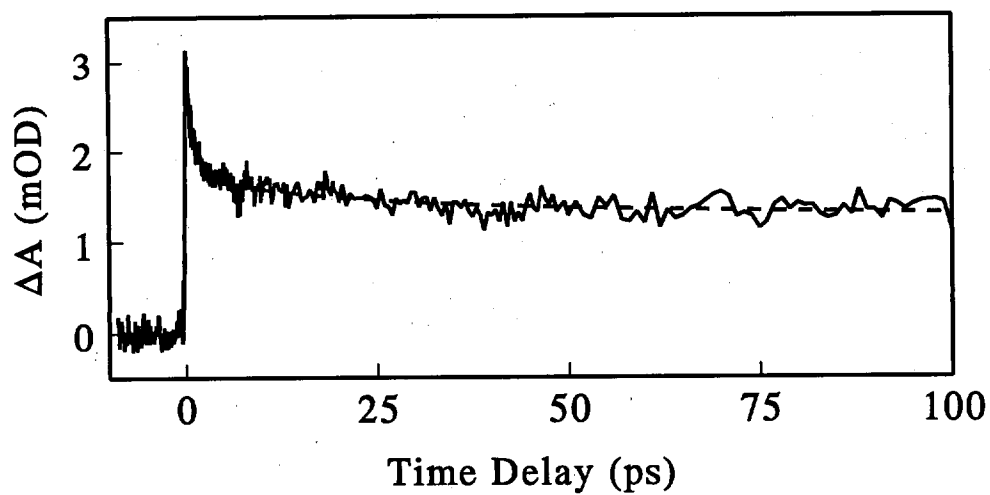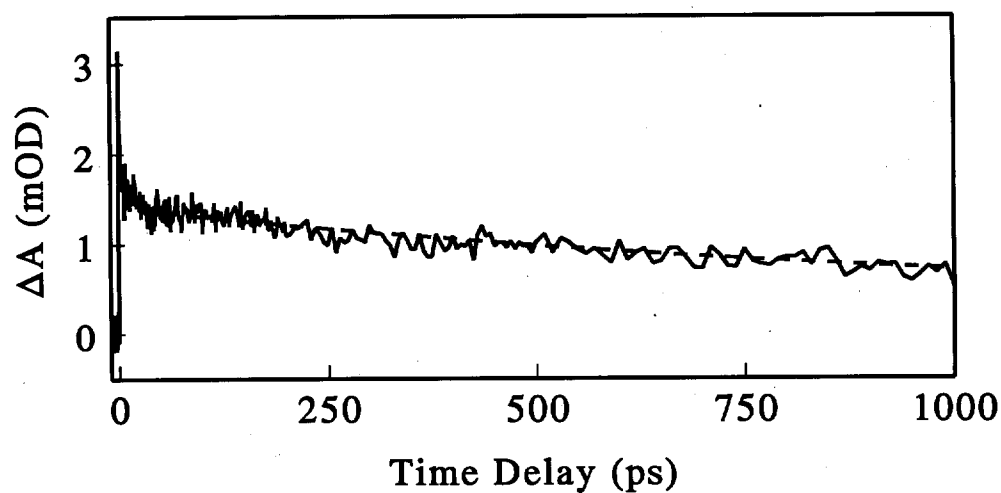

Supplement: Supplementary file 1 [file 5819925]
